# Supplementary material
Source: PubMed Central journal article supplement (PMC4535413)
Supplement: rsif20150473supp1.pdf [file rsif20150473supp1.pdf]

# Supplementary Material: Human Diffusion and City Influence

Maxime Lenormand<sup>\*1</sup>, Bruno Gonçalves<sup>2,3</sup>, Antònia Tugores<sup>1</sup>, and José Javier Ramasco<sup>1</sup>

<sup>1</sup>IFISC, Campus Universitat de les Illes Balears, 07122 Palma de Mallorca, Spain

<sup>2</sup>Aix Marseille Université, Université de Toulon, CNRS, CPT, UMR 7332, 13288 Marseille, France

<sup>3</sup>Université de Toulon, CNRS, CPT, UMR 7332, 83957 La Garde, France

As a first characterization of the data, we have computed the great circle distance  $\Delta_r$  between successive positions of the same Twitter user living in one of the 58 cities (Figure S1). The distribution  $P(\Delta_r)$  for each city is well approximated by a power law with an average exponent value of 1.5. These results are consistent with the exponent obtained in other studies [1, 2, 3]. It is interesting to note that the distributions are very similar for all the cities.

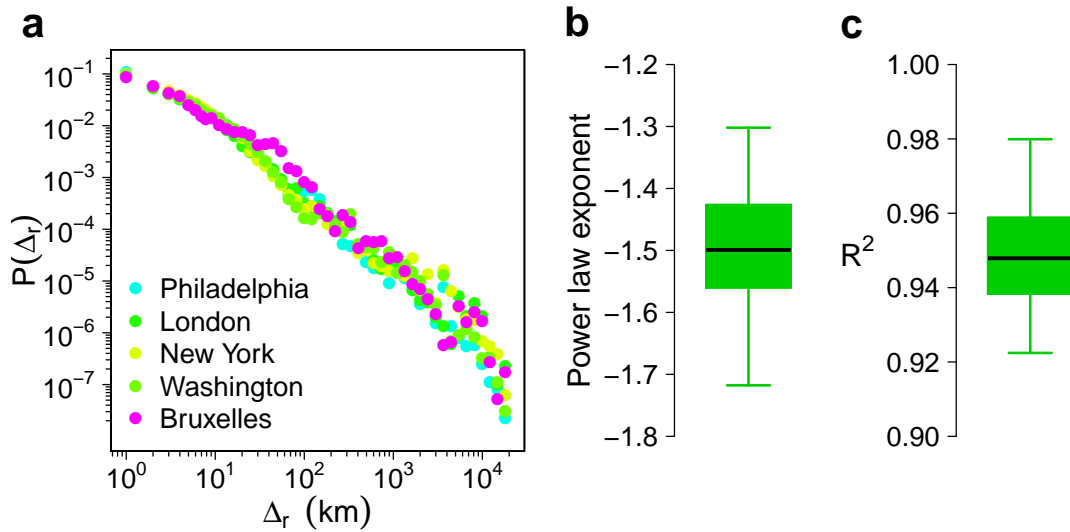

**Figure S1: Probability density function of distance travelled by the local Twitter users.** (a) Probability density function  $P(\Delta_r)$  of the distance travelled by the local Twitter users for 5 cities drawn at random among the 58 case studies.  $\Delta_r$  is the great circle distance between each successive position of the local Twitter users. (b) Boxplot of the 58 power-law exponent. (c) Boxplot of the  $R^2$ . The boxplot is composed of the minimum value, the lower hinge, the median, the upper hinge and the maximum value.

\*maxime@ifisc.uib.es

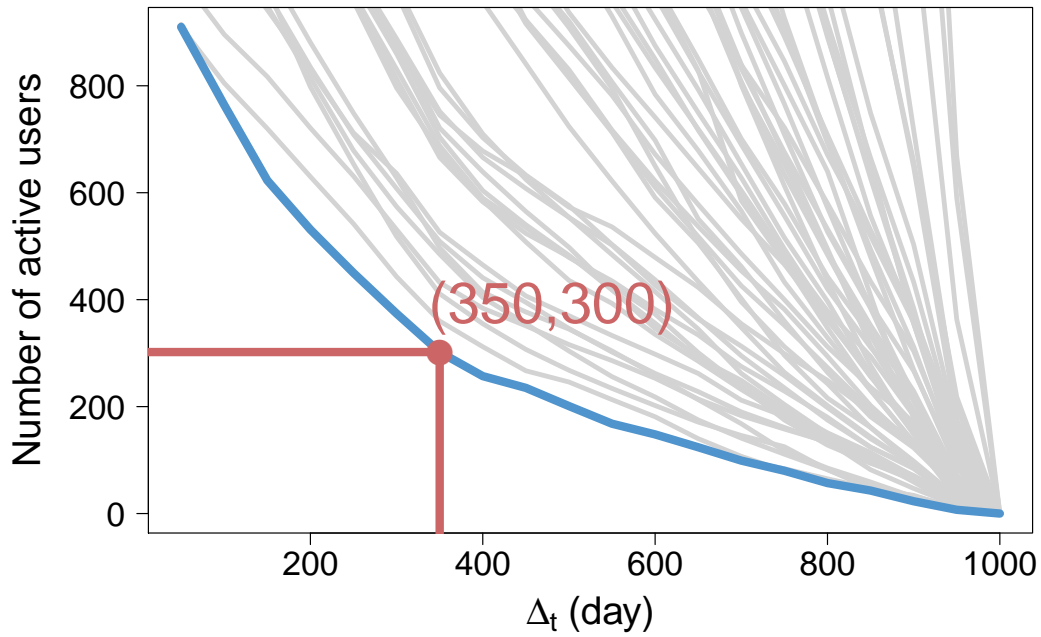

**Figure S2: Minimum number of active users as a function of  $\Delta_t$  (blue line).** The gray lines represent the number of active users as a function of  $\Delta_t$  for the 58 cities.

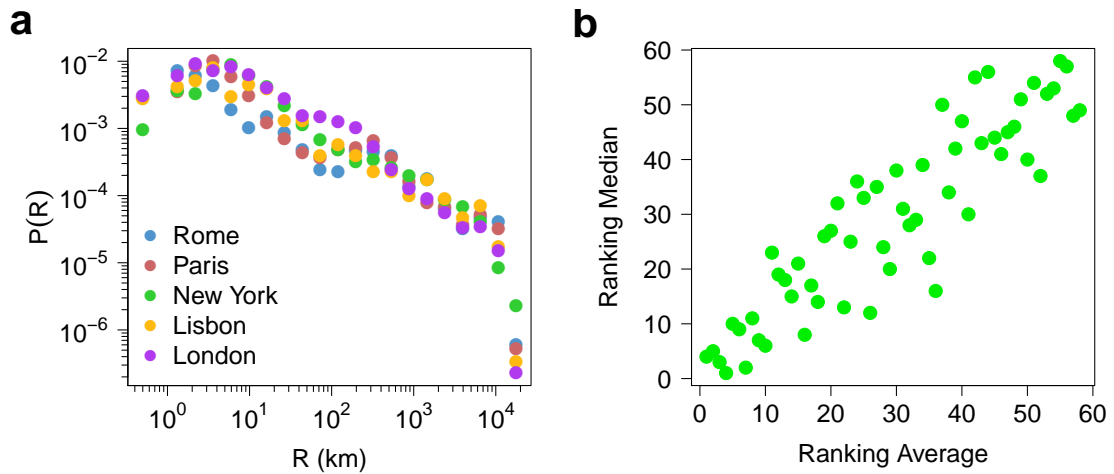

**Figure S3: Radius.** (a) Probability density function of the radius per Twitter users for 5 cities. (b) Ranking by median radius as a function of the ranking by average radius. The rankings are based on an average of the two statistics over 100 independent extractions of a set of  $u = 300$  users.

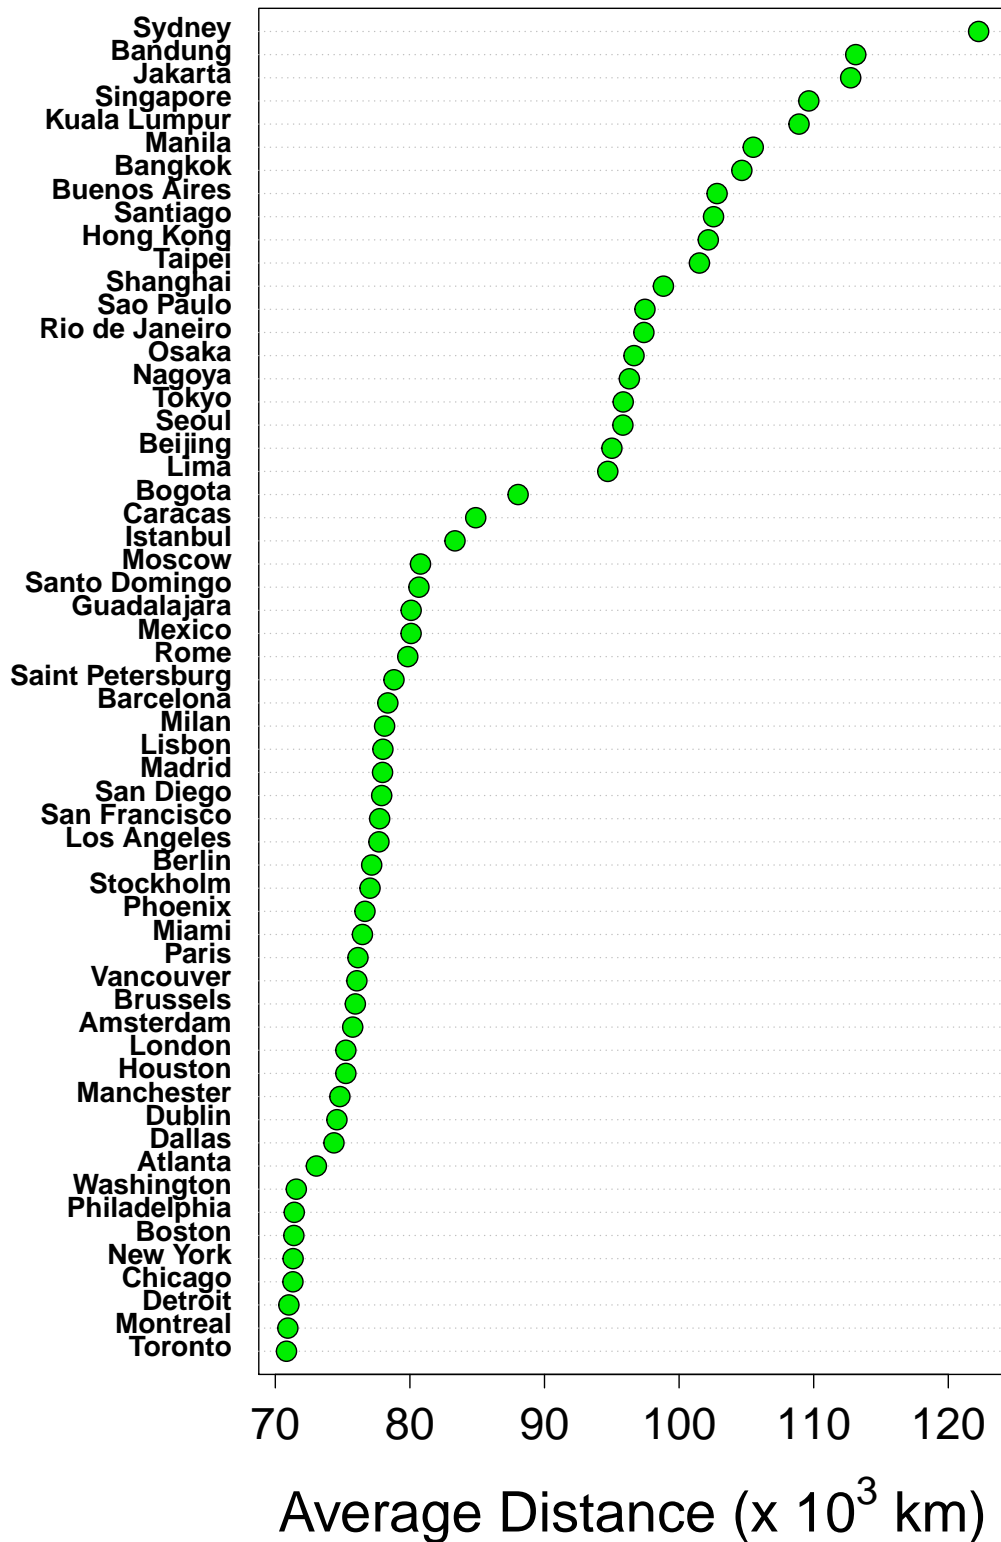

Figure S4: Ranking of the cities according to the average distance between the center of the city and all the Twitter users' place of residence (represented by the centroid of the cell of residence).

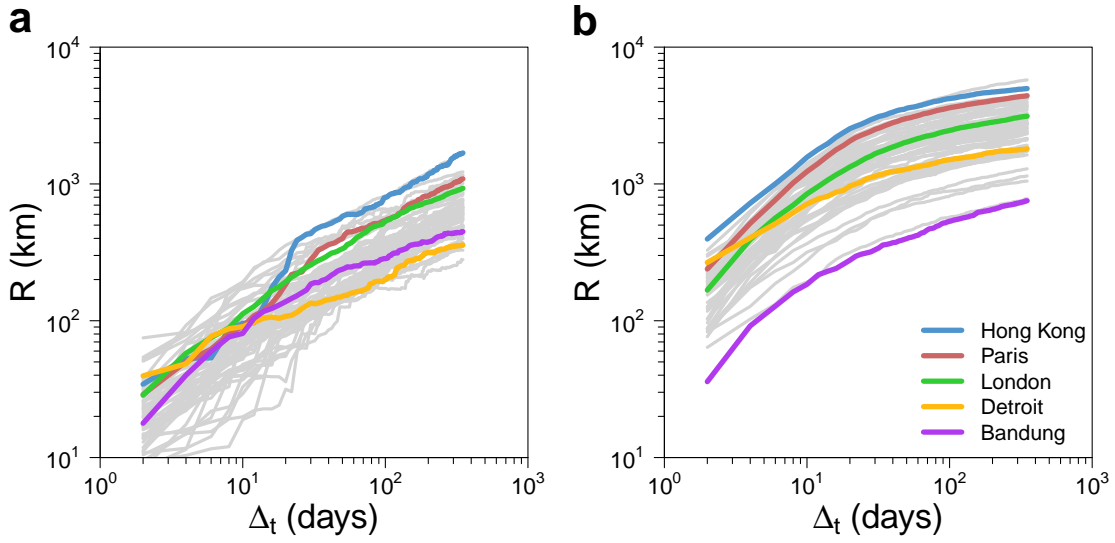

**Figure S5: Evolution of the average radius for the local users (a) and for the non-local users (b).** Each curve represents the evolution of the average radius  $R$  averaged over 100 independent extractions of a set of  $u = 100$  users as a function of the number of days  $\Delta_t$  since the first passage in the city. In order to show the general trend, each gray curve corresponds to a city. The evolution of the radius for several cities is highlighted, such as the top and bottom rankers or representatives of the two main detected behaviors.

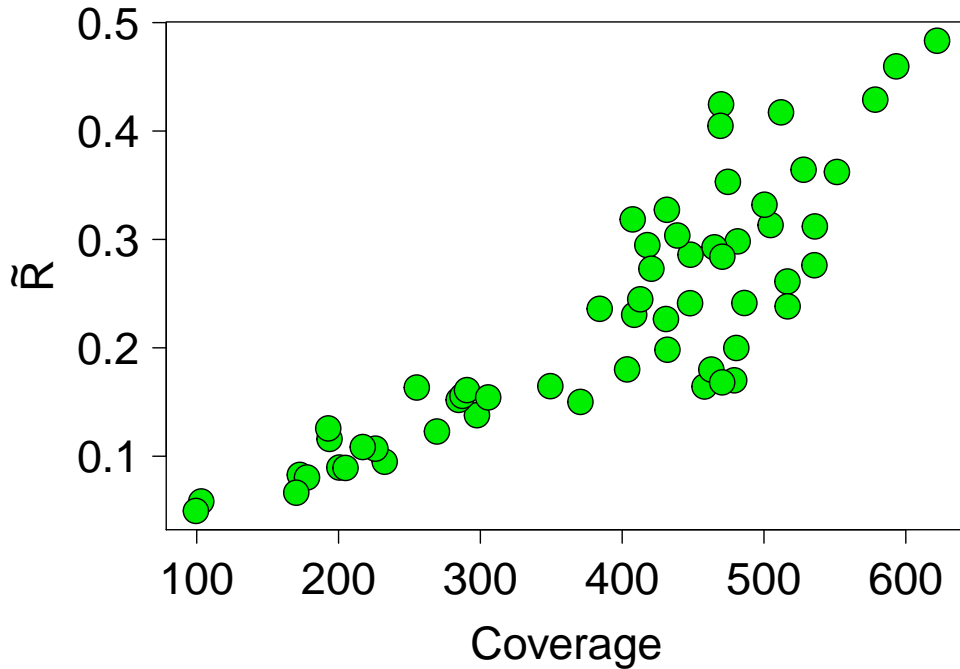

**Figure S6: Coverage as a function of  $\tilde{R}$  for the 58 cities.** A certain level of correlation can be observed between both metrics. Both metrics are averaged over 100 independent extractions of a set of  $u = 300$  users.

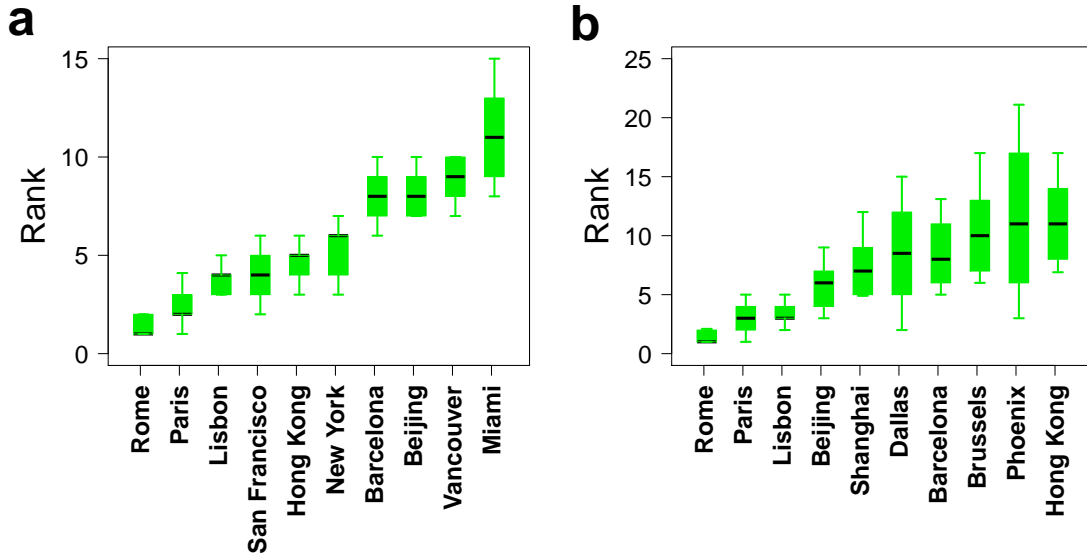

**Figure S7: Variations of the rankings over 100 realizations.** (a) Ranking for the normalized average radius. (b) Ranking for the coverage. The boxplot is composed of the minimum value, the lower hinge, the median, the upper hinge and the maximum value. The rankings are averaged over 100 independent extractions of a set of  $u = 300$  users.

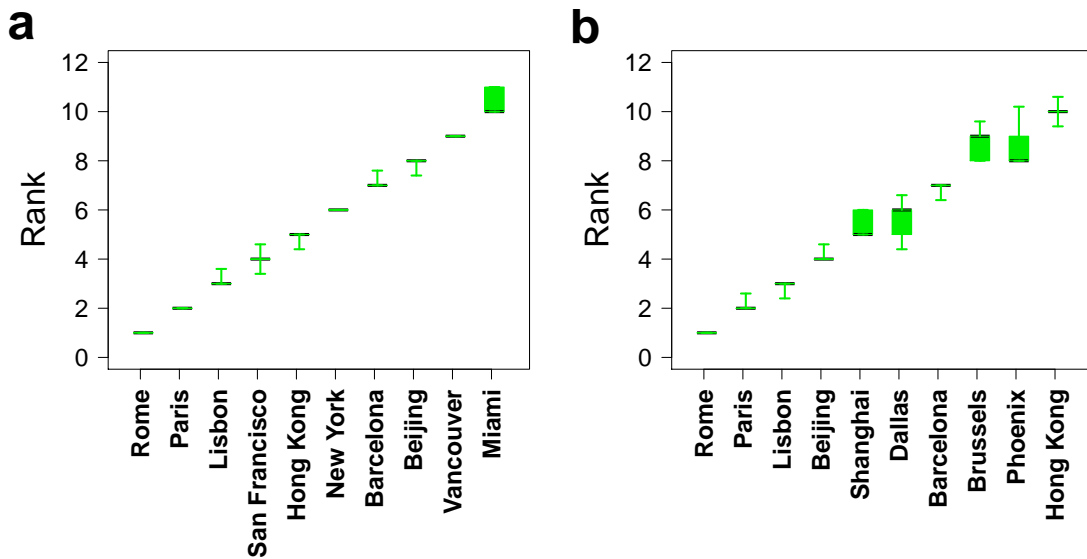

**Figure S8: Variations of the rankings over 10 realizations performed on the average over 10 realizations.** (a) Ranking for the normalized average radius. (b) Ranking for the coverage. The boxplot is composed of the minimum value, the lower hinge, the median, the upper hinge and the maximum value. The rankings are averaged over 100 independent extractions of a set of  $u = 300$  users.

## Entropy index

The natural way of taking the heterogeneity of visiting frequencies into consideration is to introduce an entropy measure. If we define the probability  $p_i^t$  than an individual tweet originating from the users we are considering originated in a cell  $i$ , then the entropy  $S$  for a given time interval  $\Delta t$  is given by:

$$S(t) = -\frac{\sum_{i=1}^N p_i^t \log(p_i^t)}{\log(\mathcal{N}(t))} \quad (1)$$

where the normalizing factor  $\mathcal{N}(t)$ , the number of cells with non-zero number of tweets, corresponds to the uniform case where each tweet has the same probability of being produced within each cell. With this normalization, the entropy is defined to vary just between 0 and 1, regardless of the number of cells and tweets we might consider in each case.

The entropy as a function of the number of visited cells is plotted in Figure 7a. The entropy enhances with the number of visited cells despite the normalization, which implies that the tweets tend to distribute more uniformly for those cities with larger areas covered and therefore with a larger global projection. Besides the general trend, there are some interesting outliers such as Moscow and Saint Petersburg, with a high area covered given the size of Russia but low entropy meaning that the travels concentrate toward a few cells (likely the cities in a vast territory). On the other extreme, we find Osaka and Nagoya with a low are covered but high entropy. A possible reason is that the travels can be mostly within Japan but since the population in the country is well distributed, the trip destinations are well mixed.

As can be seen in Figure 7b, the entropy measured in the cities based only in local users is way lower than for the non-locals. This means that the locals move toward more concentrated locations, in contrast to the comparatively higher diversity of origins of the non-local visitors.

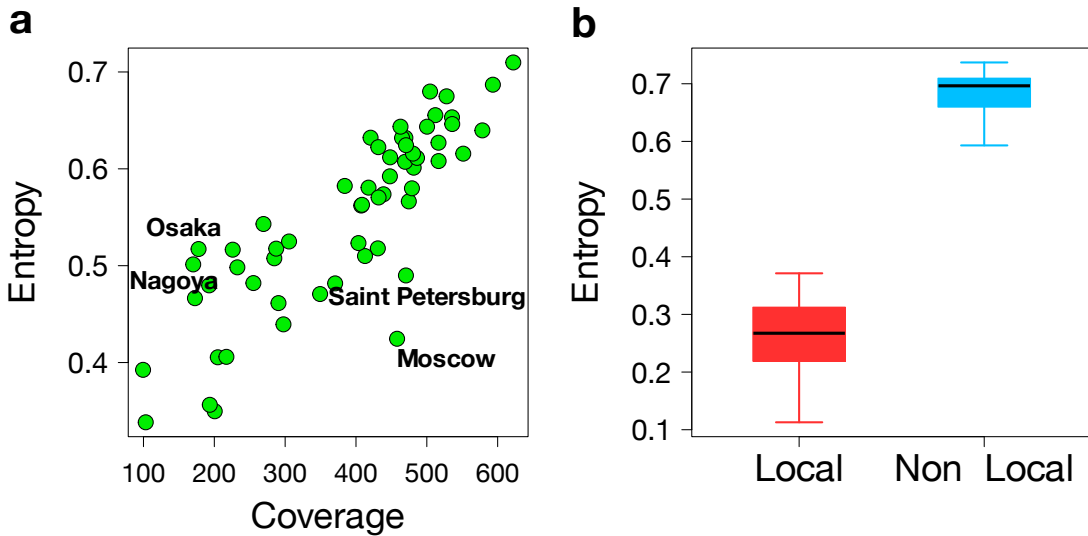

**Figure S9: Entropy index according to the Twitter user type.** (a) Entropy index as a function of the number of cells visited by  $u = 300$  Twitter users drawn at random. (b) Box plot with the entropy measured for the different cities separating the users as locals and non-locals. The number of users is  $u = 100$  in this case.

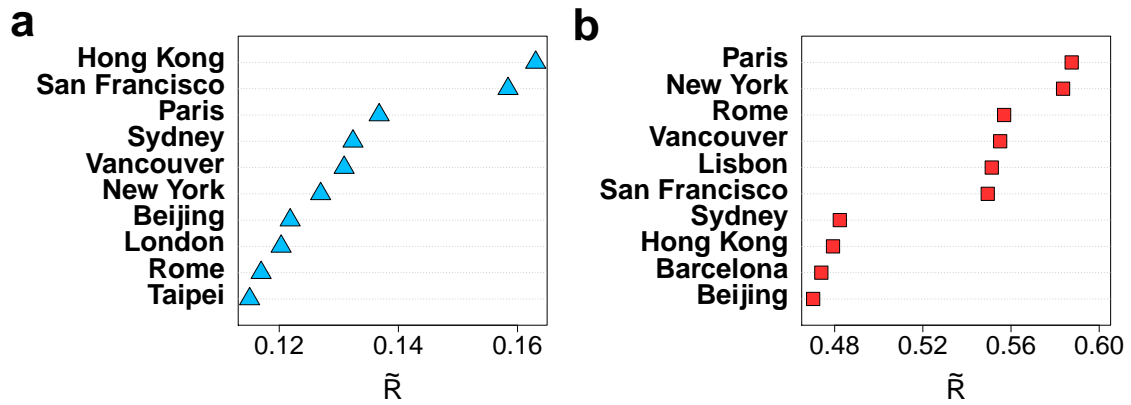

**Figure S10: Relation between local and non-local users.** (a) Top 10 ranking cities based only on local users according to the average radius. (b) Top 10 ranking cities based only on non-local users according to the average radius. In all the cases, the number of local and non-local users extracted is  $u = 100$  for every city and all the metrics are averaged over 100 independent extractions.

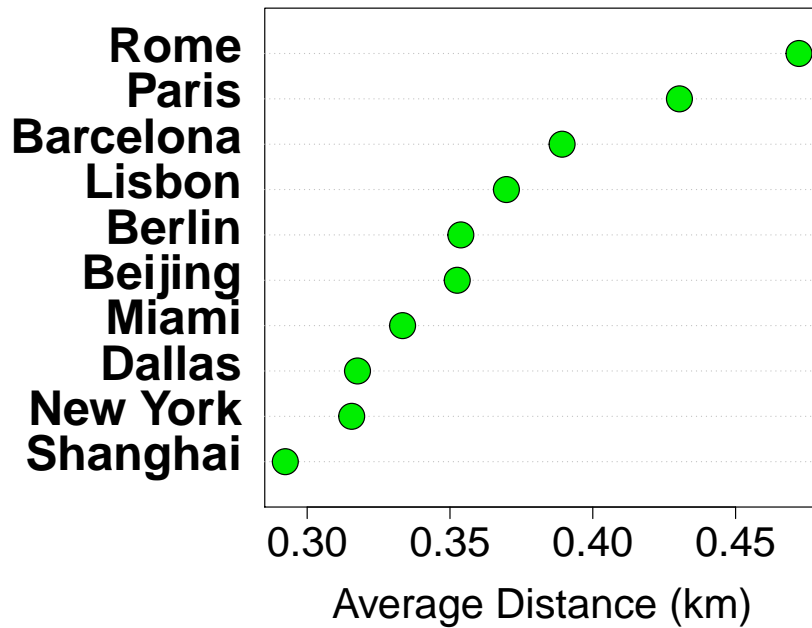

**Figure S11: City attractiveness.** Top 10 cities ranked by the average distance between the Twitter users' residences (represented by the centroid of the cell of residence) and the city center for  $u = 1000$  Twitter users drawn at random. The metric is averaged over 100 independent extractions.

Table S1: Description of the case studies

| City             | Number of users | Number of Tweets | Number of Tweets per user |
|------------------|-----------------|------------------|---------------------------|
| Amsterdam        | 2661            | 305363           | 114.75                    |
| Atlanta          | 2863            | 296390           | 103.52                    |
| Bandung          | 5620            | 405241           | 72.11                     |
| Bangkok          | 2604            | 239514           | 91.98                     |
| Barcelona        | 1713            | 165934           | 96.87                     |
| Beijing          | 1299            | 131922           | 101.56                    |
| Berlin           | 678             | 45238            | 66.72                     |
| Bogota           | 2226            | 213739           | 96.02                     |
| Boston           | 752             | 73561            | 97.82                     |
| Brussels         | 1243            | 97688            | 78.59                     |
| Buenos Aires     | 411             | 28500            | 69.34                     |
| Caracas          | 3625            | 375933           | 103.71                    |
| Chicago          | 2191            | 257572           | 117.56                    |
| Dallas           | 1214            | 128834           | 106.12                    |
| Detroit          | 13608           | 938524           | 68.97                     |
| Dublin           | 704             | 78434            | 111.41                    |
| Guadalajara      | 721             | 57031            | 79.10                     |
| Hong Kong        | 1098            | 108203           | 98.55                     |
| Houston          | 1582            | 186830           | 118.10                    |
| Istanbul         | 1321            | 103117           | 78.06                     |
| Jakarta          | 1919            | 196188           | 102.23                    |
| Kuala Lumpur     | 509             | 42665            | 83.82                     |
| Lima             | 360             | 42186            | 117.18                    |
| Lisbon           | 6782            | 698998           | 103.07                    |
| London           | 6392            | 580084           | 90.75                     |
| Los Angeles      | 1760            | 159781           | 90.78                     |
| Madrid           | 1566            | 202650           | 129.41                    |
| Manchester       | 1792            | 163090           | 91.01                     |
| Manila           | 4118            | 293015           | 71.15                     |
| Mexico           | 2534            | 247486           | 97.67                     |
| Miami            | 688             | 84544            | 122.88                    |
| Milan            | 666             | 61175            | 91.85                     |
| Montreal         | 1239            | 133461           | 107.72                    |
| Moscow           | 2334            | 263132           | 112.74                    |
| Nagoya           | 9668            | 892442           | 92.31                     |
| New York         | 4044            | 398769           | 98.61                     |
| Osaka            | 2567            | 247449           | 96.40                     |
| Paris            | 432             | 43301            | 100.23                    |
| Philadelphia     | 2206            | 247159           | 112.04                    |
| Phoenix          | 1380            | 150468           | 109.03                    |
| Rio de Janeiro   | 3292            | 352777           | 107.16                    |
| Rome             | 824             | 88402            | 107.28                    |
| Saint Petersburg | 497             | 51601            | 103.82                    |
| San Diego        | 1810            | 182035           | 100.57                    |
| San Francisco    | 4628            | 419032           | 90.54                     |
| Santiago         | 2471            | 250639           | 101.43                    |
| Santo Domingo    | 302             | 20245            | 67.04                     |
| Sao Paulo        | 6479            | 653909           | 100.93                    |
| Seoul            | 1898            | 152666           | 80.44                     |
| Shanghai         | 526             | 49282            | 93.69                     |
| Singapore        | 3501            | 288267           | 82.34                     |
| Stockholm        | 745             | 106366           | 142.77                    |
| Sydney           | 1176            | 121426           | 103.25                    |
| Taipei           | 485             | 40259            | 83.01                     |
| Tokyo            | 10333           | 844602           | 81.74                     |
| Toronto          | 1476            | 135914           | 92.08                     |
| Vancouver        | 796             | 70018            | 87.96                     |
| Washington       | 3755            | 421374           | 112.22                    |



**Table S2: Comparison of the regional and the global betweenness rankings.**

| <b>Community</b> | <b>Global Ranking</b>                                                                                                                                                                                                                                                                                                                                                                                                                                                                                                                     | <b>Regional Ranking</b>                                                                                                                                                                                                                                                                                                                                                                                                                             |
|------------------|-------------------------------------------------------------------------------------------------------------------------------------------------------------------------------------------------------------------------------------------------------------------------------------------------------------------------------------------------------------------------------------------------------------------------------------------------------------------------------------------------------------------------------------------|-----------------------------------------------------------------------------------------------------------------------------------------------------------------------------------------------------------------------------------------------------------------------------------------------------------------------------------------------------------------------------------------------------------------------------------------------------|
| North America    | <ol style="list-style-type: none"> <li>1. New York (1)</li> <li>2. Miami (6)</li> <li>3. San Francisco (8)</li> <li>4. Los Angeles (9)</li> <li>5. Chicago (18)</li> <li>6. Toronto (19)</li> <li>7. San Diego (23)</li> <li>8. Detroit (25)</li> <li>9. Montreal (26)</li> <li>10. Atlanta (27)</li> <li>11. Washington (29)</li> <li>12. Vancouver (35)</li> <li>13. Dallas (36)</li> <li>14. Phoenix (46)</li> <li>15. Boston (47)</li> <li>16. Houston (48)</li> <li>17. Philadelphia (50)</li> <li>18. Santo Domingo (58)</li> </ol> | <ol style="list-style-type: none"> <li>1. New York</li> <li>2. Los Angeles</li> <li>3. Chicago</li> <li>4. Toronto</li> <li>5. Detroit</li> <li>6. Miami</li> <li>7. Dallas</li> <li>8. San Francisco</li> <li>9. Washington</li> <li>10. Atlanta</li> <li>11. Phoenix</li> <li>12. Vancouver</li> <li>13. Montreal</li> <li>14. Boston</li> <li>15. Houston</li> <li>16. San Diego</li> <li>17. Philadelphia</li> <li>18. Santo Domingo</li> </ol> |
| Europe           | <ol style="list-style-type: none"> <li>1. London (2)</li> <li>2. Paris (3)</li> <li>3. Madrid (10)</li> <li>4. Barcelona (11)</li> <li>5. Moscow (16)</li> <li>6. Berlin (20)</li> <li>7. Rome (21)</li> <li>8. Amsterdam (24)</li> <li>9. Lisbon (38)</li> <li>10. Milan (40)</li> <li>11. Brussels (41)</li> <li>12. Istanbul (42)</li> <li>13. Saint Petersburg (45)</li> <li>14. Dublin (49)</li> <li>15. Manchester (51)</li> <li>16. Stockholm (57)</li> </ol>                                                                      | <ol style="list-style-type: none"> <li>1. London</li> <li>2. Paris</li> <li>3. Moscow</li> <li>4. Barcelona</li> <li>5. Berlin</li> <li>6. Rome</li> <li>7. Madrid</li> <li>8. Lisbon</li> <li>9. Amsterdam</li> <li>10. Saint Petersburg</li> <li>11. Dublin</li> <li>12. Istanbul</li> <li>13. Manchester</li> <li>14. Brussels</li> <li>15. Milan</li> <li>16. Stockholm</li> </ol>                                                              |
| Asia             | <ol style="list-style-type: none"> <li>1. Singapore (5)</li> <li>2. Hong Kong (7)</li> <li>3. Taipei (13)</li> <li>4. Jakarta (15)</li> <li>5. Kuala Lumpur (22)</li> <li>6. Seoul (30)</li> <li>7. Bangkok (31)</li> <li>8. Shanghai (32)</li> <li>9. Beijing (33)</li> <li>10. Sydney (34)</li> <li>11. Manila (43)</li> <li>12. Bandung (56)</li> </ol>                                                                                                                                                                                | <ol style="list-style-type: none"> <li>1. Singapore</li> <li>2. Hong Kong</li> <li>3. Jakarta</li> <li>4. Bangkok</li> <li>5. Shanghai</li> <li>6. Taipei</li> <li>7. Sydney</li> <li>8. Kuala Lumpur</li> <li>9. Seoul</li> <li>10. Manila</li> <li>11. Bandung</li> <li>12. Beijing</li> </ol>                                                                                                                                                    |
| South America    | <ol style="list-style-type: none"> <li>1. Buenos Aires (12)</li> <li>2. Sao Paulo (14)</li> <li>3. Bogota (28)</li> <li>4. Santiago (37)</li> <li>5. Rio de Janeiro (39)</li> <li>6. Lima (44)</li> <li>7. Caracas (55)</li> </ol>                                                                                                                                                                                                                                                                                                        | <ol style="list-style-type: none"> <li>1. Buenos Aires</li> <li>2. Sao Paulo</li> <li>3. Bogota</li> <li>4. Rio de Janeiro</li> <li>5. Santiago</li> <li>6. Caracas</li> <li>7. Lima</li> </ol>                                                                                                                                                                                                                                                     |
| Japan            | <ol style="list-style-type: none"> <li>1. Tokyo (4)</li> <li>2. Osaka (53)</li> <li>3. Nagoya (54)</li> </ol>                                                                                                                                                                                                                                                                                                                                                                                                                             | <ol style="list-style-type: none"> <li>1. Tokyo</li> <li>2. Osaka</li> <li>3. Nagoya</li> </ol>                                                                                                                                                                                                                                                                                                                                                     |
| Mexico           | <ol style="list-style-type: none"> <li>1. Mexico (17)</li> <li>2. Guadalajara (52)</li> </ol>                                                                                                                                                                                                                                                                                                                                                                                                                                             | <ol style="list-style-type: none"> <li>1. Guadalajara</li> <li>2. Mexico</li> </ol>                                                                                                                                                                                                                                                                                                                                                                 |

## References

- [1] Brockmann D, Hufnagel L, Geisel T. 2006 The scaling laws of human travel. *Nature* **439**, 462–465. (doi:10.1038/nature04292)
- [2] Gonzalez MC, Hidalgo CA, Barabasi A-L. 2008 Understanding individual human mobility patterns. *Nature* **453**, 779–782. (doi:10.1038/nature06958)
- [3] Hawelka B, Sitko I, Beinat E, Sobolevsky S, Kazakopoulos P, Ratti C. 2014 Geo-located twitter as a proxy for global mobility patterns. *Cartography and Geographic Information Science* **41**, 260–271. (doi:10.1080/15230406.2014.890072)
